# Supplementary material for: Reducing antibiotic treatment duration for ventilator-associated pneumonia (REGARD-VAP): a trial protocol for a randomised clinical trial
Source: PubMed Central journal article supplement (PMC8126270; doi:10.1136/bmjopen-2021-050105), 2021-05-13
Supplement: bmjopen-2021-050105supp002.pdf [file bmjopen-2021-050105supp002.pdf]

**Supplementary file 2**

Detailed definitions of primary and secondary outcomes.

|                              | Definition                                                                                                                                                                                                                                                        | Method of data capture                                                                                                                                                                             |
|------------------------------|-------------------------------------------------------------------------------------------------------------------------------------------------------------------------------------------------------------------------------------------------------------------|----------------------------------------------------------------------------------------------------------------------------------------------------------------------------------------------------|
| Mortality                    | Death from any cause within 60 days of enrolment                                                                                                                                                                                                                  | Medical record review and/or interview                                                                                                                                                             |
| Pneumonia recurrence         | Additional episode of pneumonia as determined by two independent infectious disease or respiratory medicine experts blinded to the randomization within 60 days of enrolment                                                                                      | Medical record review for pneumonia symptoms following the performance of new respiratory culture or change in antibiotic regime by independent experts blinded to randomization                   |
| Ventilator-associated events | Additional episode of respiratory event fulfilling the US CDC NHSN criteria for VAP within 60 days of enrolment, but not determined to be pneumonia recurrence by two independent infectious disease or respiratory medicine experts blinded to the randomization | Medical record review for the US CDC NHSN criteria for VAP following the performance of new respiratory culture or change in antibiotic regime by independent experts blinded to the randomization |
| Duration of mechanical       | Total number of days which a study participant is dependent                                                                                                                                                                                                       | Medical record review                                                                                                                                                                              |

|                                                                                     |                                                                                                                                                                                                                                          |                                                                                             |
|-------------------------------------------------------------------------------------|------------------------------------------------------------------------------------------------------------------------------------------------------------------------------------------------------------------------------------------|---------------------------------------------------------------------------------------------|
| ventilation                                                                         | on a ventilator for respiratory support within 60 days of enrolment                                                                                                                                                                      |                                                                                             |
| Duration of hospitalization                                                         | Total number of days of hospitalization which the index episode of VAP that led to the study participant's enrolment took place                                                                                                          | Medical record review                                                                       |
| Duration of exposure to antibiotics during hospitalization                          | Total number of days which the study participant is administered antibiotics while inpatient for the index episode of VAP that led to the study participant's enrolment                                                                  | Inpatient medicine prescription record review                                               |
| Acquisition of multidrug resistant infection or colonization during hospitalization | Clinical cultures positive for third-generation cephalosporin resistant Enterobacteriaceae, carbapenem-resistant Gram-negative bacteria, methicillin-resistant <i>Staphylococcus aureus</i> and vancomycin-resistant <i>Enterococcus</i> | Review of all clinical cultures performed for the study participants during hospitalization |
| Number and types of extra-pulmonary                                                 | Clinical cultures positive for any organisms taken from normally sterile sites including                                                                                                                                                 | Review of all clinical cultures performed for the study participants during                 |

|                                                                 |                                                                                                                                                                                                                                                                                     |                 |
|-----------------------------------------------------------------|-------------------------------------------------------------------------------------------------------------------------------------------------------------------------------------------------------------------------------------------------------------------------------------|-----------------|
| infections identified from sterile sites during hospitalization | blood, cerebrospinal fluid, pleural fluid, peritoneal fluid, pericardial fluid, bone and synovial tissue, joint fluid, specimen obtained from surgery or aspirate from lymph node, brain, heart, liver, spleen, vitreous fluid, kidney, pancreas, ovary, vascular tissue and muscle | hospitalization |
|-----------------------------------------------------------------|-------------------------------------------------------------------------------------------------------------------------------------------------------------------------------------------------------------------------------------------------------------------------------------|-----------------|
